# Supplementary material for: In silico analysis indicate putative action modes of At2g47590 (GERALT) and At4g25290 (TATOOINE) proteins, two outcast of Arabidospsis thaliana cryptochrome/photolyase family
Source: Research Square preprint supplement (doi:10.21203/rs.3.rs-7149250/v1), 2025-07-24
Supplement: Supplementary file 1 [file 298a2e55b1af013073af6b0d.docx]

Supplementary Material

In silico analysis indicate putative action modes of At2g47590 (GERALT) and At4g25290 (TATOOINE) proteins, two outcast of Arabidospsis thaliana CryDASH protein family

Katarzyna Leja1,2, Grzegorz Góralski3, Olga Sztatelman4, Katarzyna Walczewska-Szewc5, Wojciech Strzałka1, Agnieszka Katarzyna Banaś1, Joanna Grzyb6*.

1Department of Plant Biotechnology, Faculty of Biochemistry, Biophysics and Biotechnology, Jagiellonian University, Gronostajowa 7, 30-387 Kraków, Poland

2Doctoral School of Exact and Natural Sciences, Jagiellonian University, prof. S. Łojasiewicza 11, 30-348 Kraków, Poland; katarzyna.leja@doctoral.uj.edu.pl

3Plant Cytology and Embryology, Institute of Botany, Faculty of Biology, Jagiellonian University in Kraków, 9 Gronostajowa St., 30-387 Kraków, Poland

4Institute of Biochemistry and Biophysics Polish Academy of Sciences, Pawińskiego 5a, PL02106, Warsaw, Poland

5Institute of Physics, Faculty of Physics, Astronomy and Informatics, Nicolaus Copernicus University in Toruń, ul. Grudziądzka 5, 87-100 Toruń, Poland

6 Department of Biophysics, Faculty of Biotechnology, University of Wrocław, F. Joliot-Curie 14a, 50-383 Wrocław, Poland


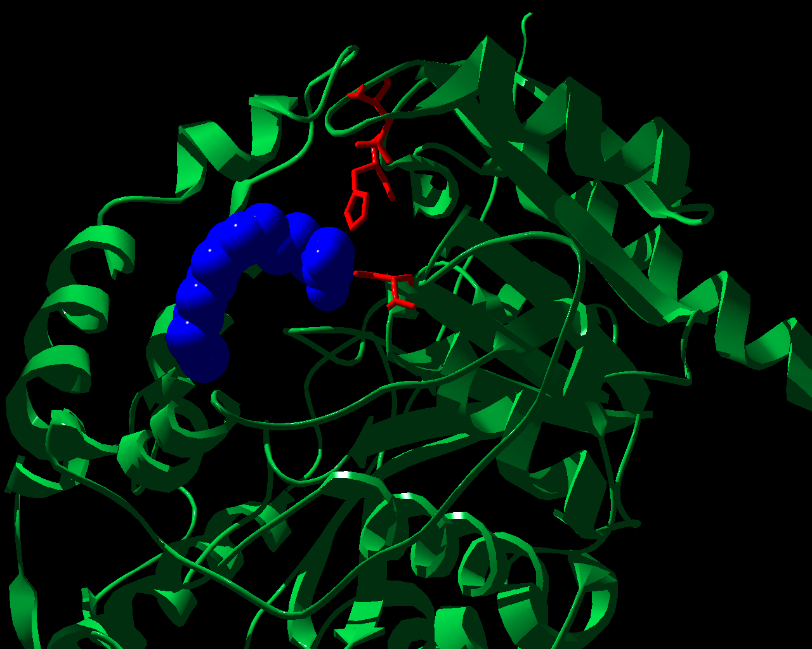


Figure S1. A fragment of TATOOINE structure (green ribbon) modeled with oleic acid (blue balls), obtained by AlphaFold3. Catalytic lipase triad amino acid residues presented as red sticks.


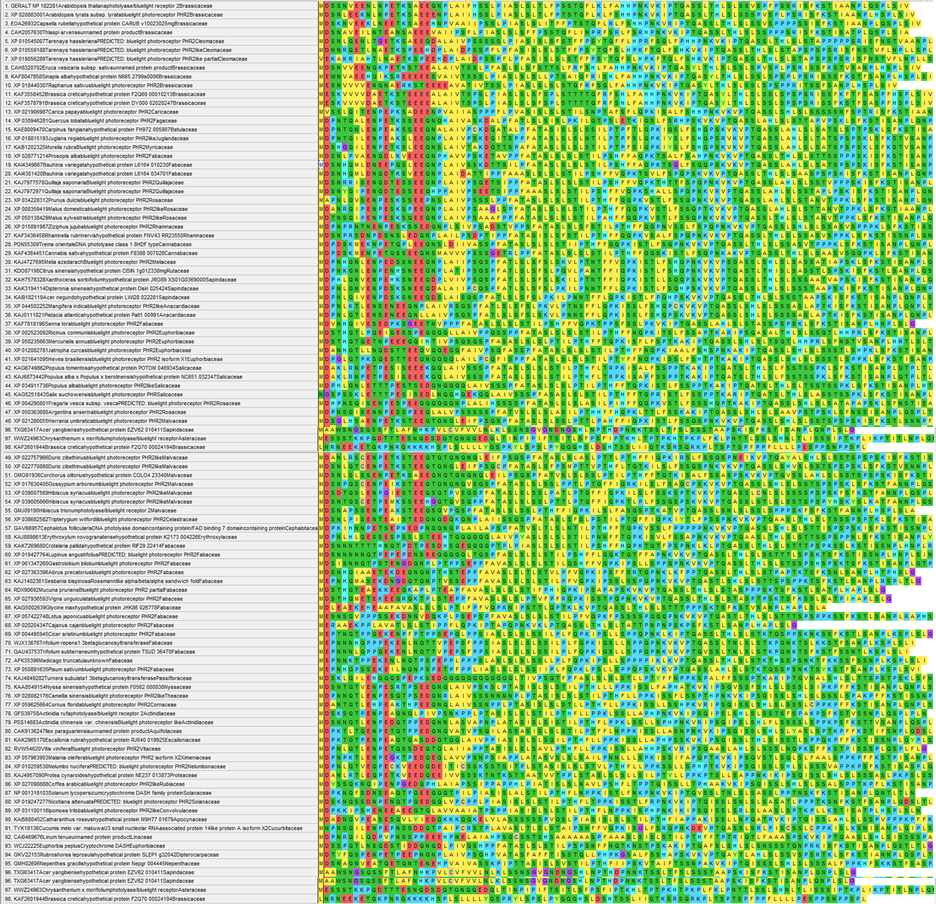


Figure S2. First 100 amino acids of GERALT sub branch proteins, colored by their physicochemical properties (acidic-red, basic - blue, neutral hydrophilic - green, hydrophobic - yellow). No alignment applied.

Table S1. The length [aa] of FAD-binding domains in selected CPF proteins, identified with PROSITe.

| **Selected PPL proteins in brackets, nominal position of domain amino acids** | Crypto/Photolyase_FAD-like (IPR036134)[aa] |
| --- | --- |
|  | |
| *Arabidopsis thaliana* AtGERALT (NP_182281.1)(323-429) | 106 |
| *Chlamydomonas reinhardtii* PHR2 protein (XP_042918714.1)(364-503) | 139 |
| Chrysanthemum morifolium (OP889330)(337-402) | 65 |
| **selected CRY-DASH proteins** | |
| *Chlamydomonas reinhardtii* CRY-DASH1 (XP_001701871.1)(375-557) | 182 |
| *Solanum lycopersicum* CRY-DASH (NP_001296304.1)(298-549) | 251 |
| *Arabidopsis thaliana* AtCRY3 (NP_568461.3)(227-518) | 242 |
| **Arabidopsis photolyases** | |
| *Arabidopsis thaliana* AtPHR1/UVR2 (NP_849651.1)(220-465) | 245 |
| *Arabidopsis thaliana* AtUVR3 (NP_566520.1)(227-518) | 291 |
